# Supplementary material
Source: Royal Society of Chemistry journal article supplement (doi:10.1039/d5tb02562a)
Supplement: d5tb02562a1.pdf [file d5tb02562a1.pdf]

## Supporting Information for

# SiQDs-based hydrogel fiber sensor for portable, on-site $\beta$ -galactosidase detection in serum

Dan Li <sup>†\*a</sup>, Yutao Shen <sup>†a</sup>, Zikai Xu <sup>a</sup>, Wenfei Zhang <sup>a</sup>, Na Li <sup>\*b</sup>, Yong Zhao <sup>\*ac</sup>

<sup>a</sup> School of Intelligent Sensing and Optoelectronic Engineering, Hebei Key Laboratory of Micro-Nano Precision Optical Sensing and Measurement Technology, Northeastern University at Qinhuangdao, Qinhuangdao 066004, China

<sup>b</sup> Guangdong Provincial Key Laboratory of Nanophotonic Functional Materials and Devices, School of Optoelectronic Science and Engineering, South China Normal University, Guangzhou 510006, China

<sup>c</sup> College of Information Science and Engineering, Northeastern University, Shenyang 110819, China

### Corresponding Authors:

[lidan1@neuq.edu.cn](mailto:lidan1@neuq.edu.cn) (D. Li);

[dreamerlina@163.com](mailto:dreamerlina@163.com) (N. Li);

[zhaoyong@ise.neu.edu.cn](mailto:zhaoyong@ise.neu.edu.cn) (Y. Zhao)

## Figure Captions

**Fig. S1** Fabrication process of fluorescent fiber probe.

**Fig. S2** FT-IR and XPS spectra of SiQDs. (a) FT-IR spectrum High resolution XPS spectra of SiQDs: (b) full range, (c) C 1s, (d) N 1s, (e) O 1s, and (f) Si 2p.

**Fig. S3** Stability assessment of SiQDs under various environmental conditions: (a) irradiation time (360 nm); (b) ionic strength (NaCl concentration); (c) temperature; (d) pH value.

**Fig. S4** Performance comparison of hydrogel fluorescent fiber-optic sensors prepared by repeated in situ polymerization using an identical fiber structure. (a) Fluorescence spectra; (b) fluorescence intensity.

**Fig. S5** Absorbance response of the commercial  $\beta$ -Gal assay kit toward various  $\beta$ -Gal activities: (a) UV-Vis absorption spectra; (b) calibration curve of absorbance versus  $\beta$ -Gal activity.

**Table S1** Detection  $\beta$ -Gal in donkey serum samples by standard recovery assay.

**Table S2** Detection  $\beta$ -Gal in real human urine samples by standard recovery assay.

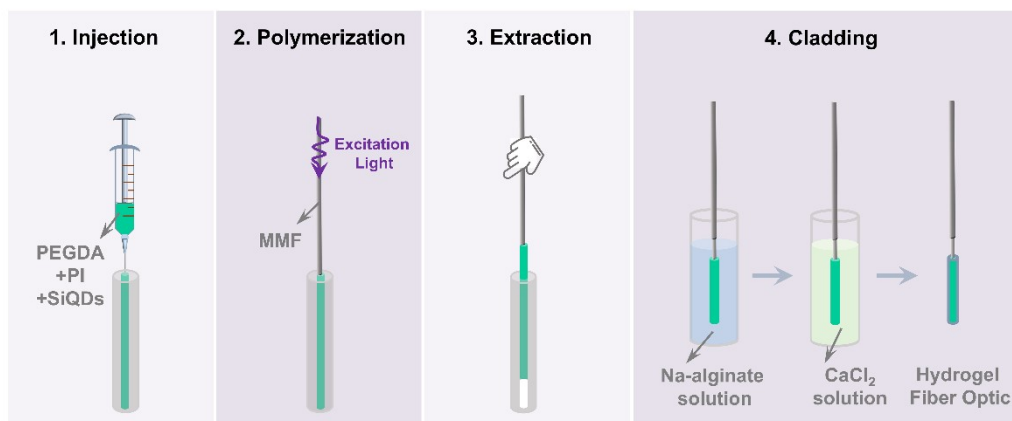

**Fig. S1** Fabrication process of fluorescent fiber probe.

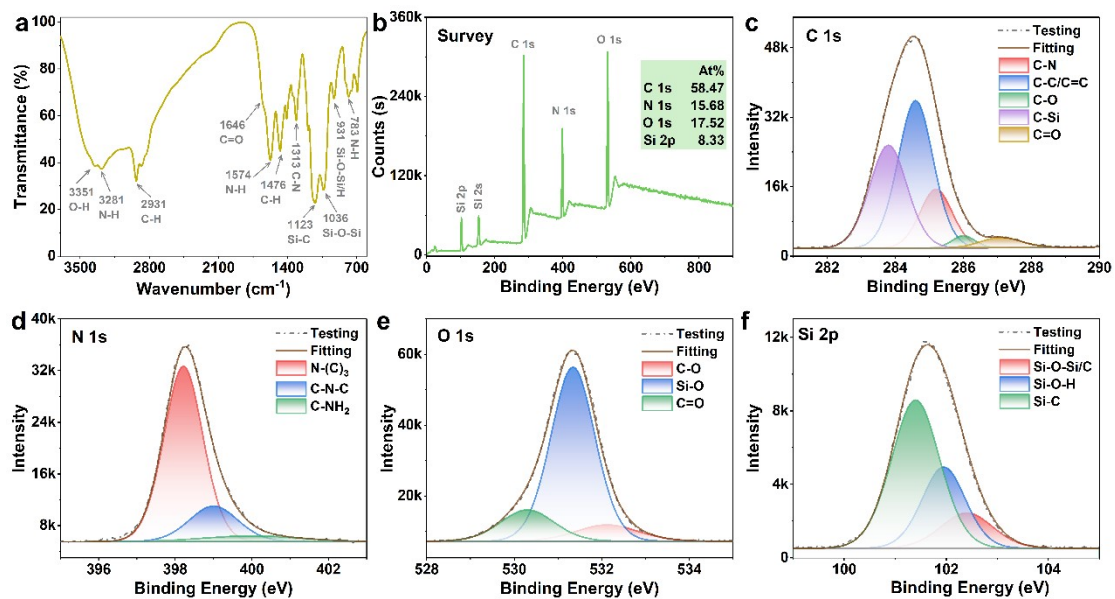

**Fig. S2** FT-IR and XPS spectra of SiQDs. (a) FT-IR spectrum High resolution XPS spectra of SiQDs: (b) full range, (c) C1s, (d) N 1s, (e) O 1s, and (f) Si 2p.

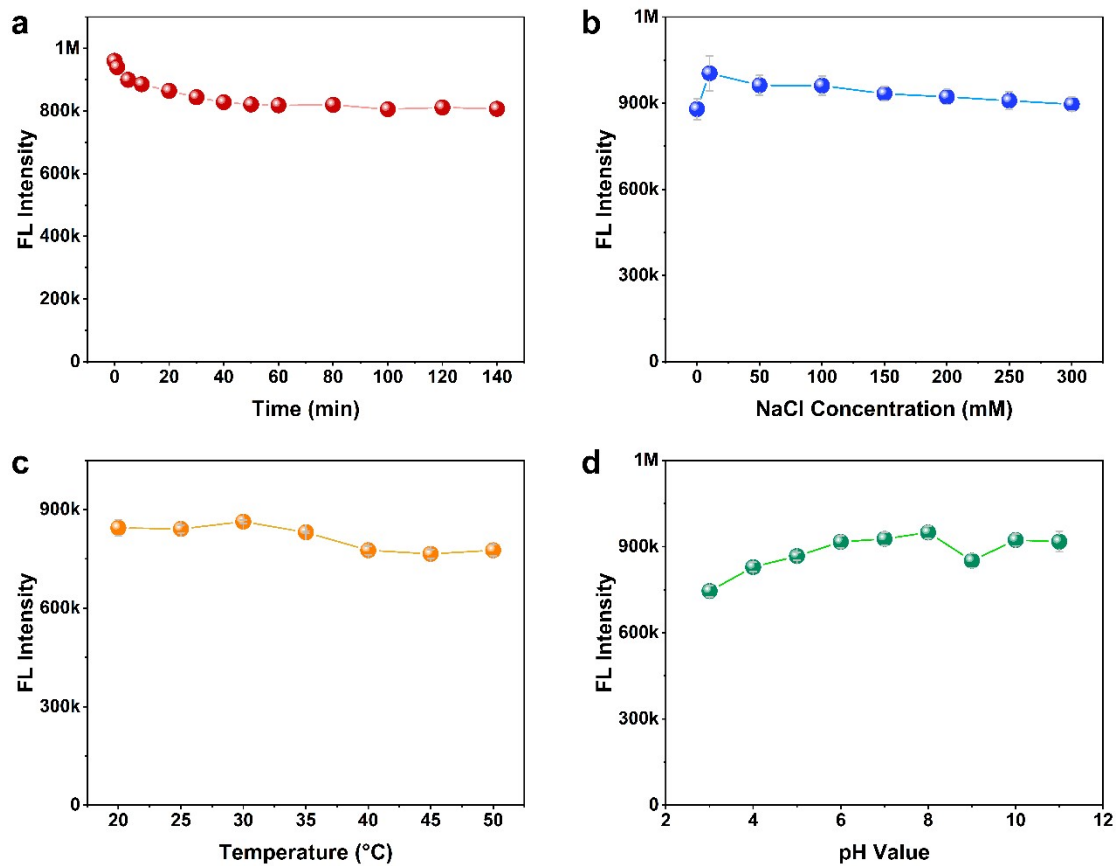

**Fig. S3** Stability assessment of SiQDs under various environmental conditions: (a) irradiation time (360 nm); (b) ionic strength (NaCl concentration); (c) temperature; (d) pH value.

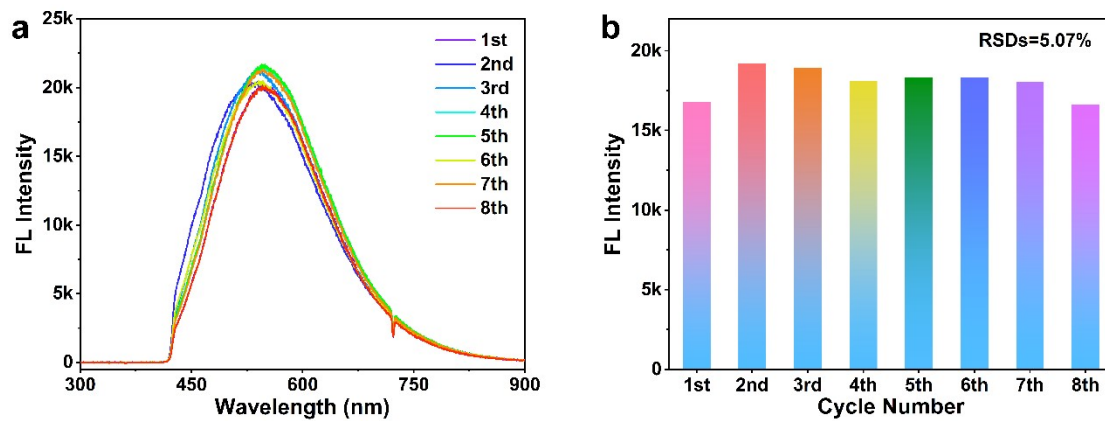

**Fig. S4** Performance comparison of hydrogel fluorescent fiber-optic sensors prepared by repeated in situ polymerization using an identical fiber structure. (a) Fluorescence spectra; (b) fluorescence intensity.

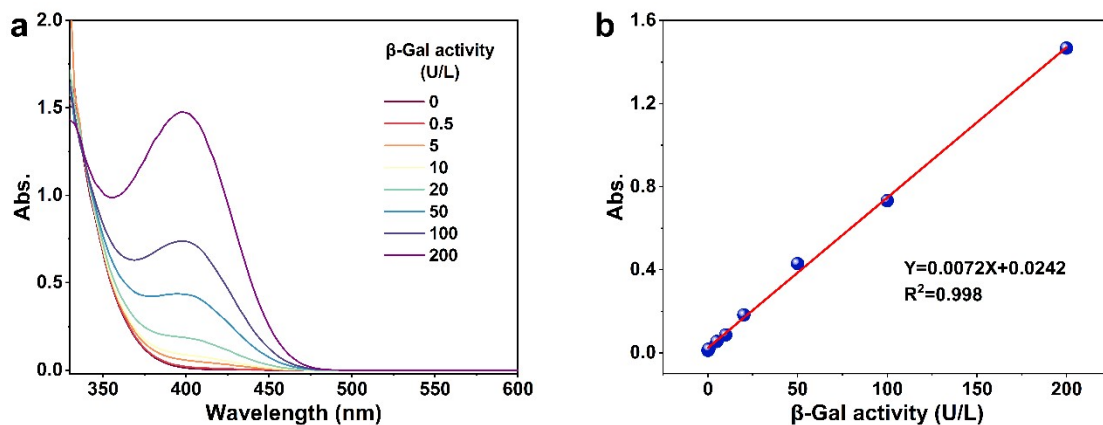

**Fig. S5** Absorbance response of the commercial  $\beta$ -Gal assay kit toward various  $\beta$ -Gal activities: (a) UV-Vis absorption spectra; (b) calibration curve of absorbance versus  $\beta$ -Gal activity.

**Table S1** Detection  $\beta$ -Gal in donkey serum samples by standard recovery assay.

| Sample  | Spiked (U·L <sup>-1</sup> ) | Found (U·L <sup>-1</sup> ) | RSD (%) | Recovery (%) |
|---------|-----------------------------|----------------------------|---------|--------------|
| Serum 1 | 0                           | 37.36                      | 2.11    | -            |
|         | 10                          | 47.77                      | 1.77    | 104.1        |
|         | 20                          | 58.74                      | 3.50    | 106.9        |
|         | 50                          | 90.03                      | 2.81    | 105.3        |
| Serum 2 | 0                           | 27.77                      | 1.24    | -            |
|         | 10                          | 36.038                     | 1.09    | 82.6         |
|         | 20                          | 47.78                      | 0.36    | 100          |
|         | 50                          | 76.37                      | 0.24    | 97.2         |
| Serum 3 | 0                           | 18.32                      | 0.19    | -            |
|         | 10                          | 26.63                      | 0.28    | 83.2         |
|         | 20                          | 36.52                      | 0.38    | 91.0         |
|         | 50                          | 63.41                      | 0.66    | 90.2         |

**Table S2** Detection  $\beta$ -Gal in real human urine samples by standard recovery assay.

| <b>Sample</b>  | <b>Spiked<br/>(U·L<sup>-1</sup>)</b> | <b>Found<br/>(U·L<sup>-1</sup>)</b> | <b>RSD<br/>(%)</b> | <b>Recovery<br/>(%)</b> |
|----------------|--------------------------------------|-------------------------------------|--------------------|-------------------------|
|                | 0                                    | 4.07                                | 15.6               | -                       |
| <b>Urine 1</b> | 5                                    | 9.16                                | 17.0               | 101.7                   |
|                | 10                                   | 12.68                               | 11.1               | 86.1                    |
|                | 0                                    | 7.54                                | 10.3               | -                       |
| <b>Urine 2</b> | 5                                    | 13.07                               | 0.1                | 110.6                   |
|                | 10                                   | 17.69                               | 0.9                | 101.5                   |
